# Supplementary material
Source: PubMed Central journal article supplement (PMC4304733)

Source Data Figure 1D

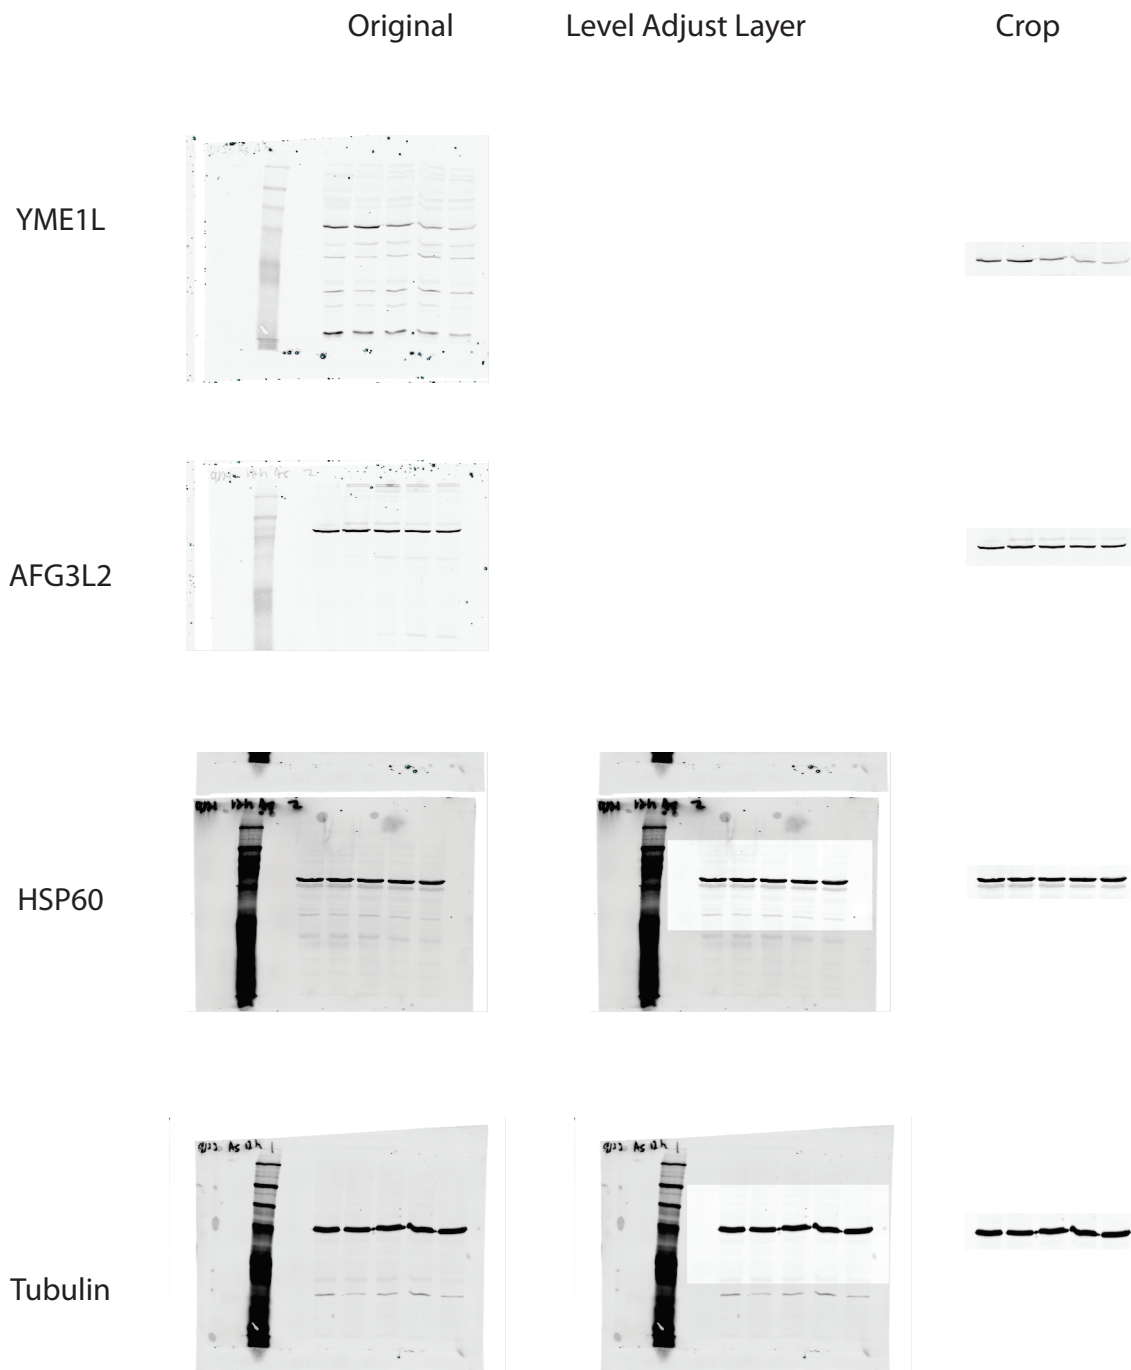

Original

Level Adjust Layer

Crop

YME1L

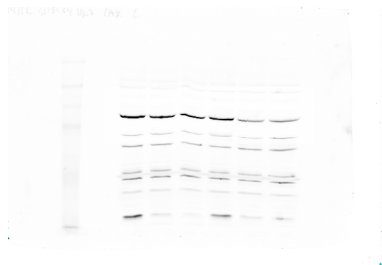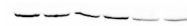

HSP60

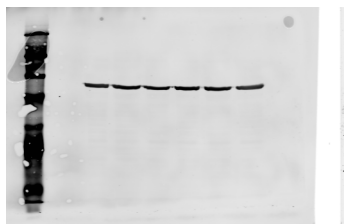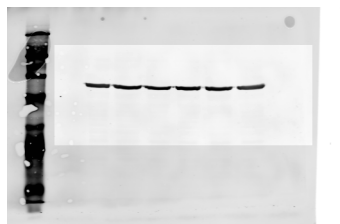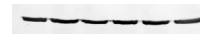

Tubulin

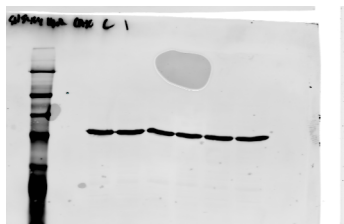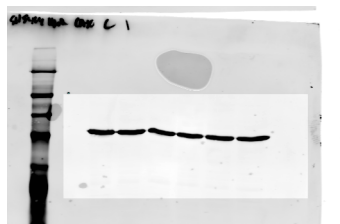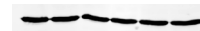

Supplement: embr0016-0097-sd3.pdf [file embr0016-0097-sd3.pdf]

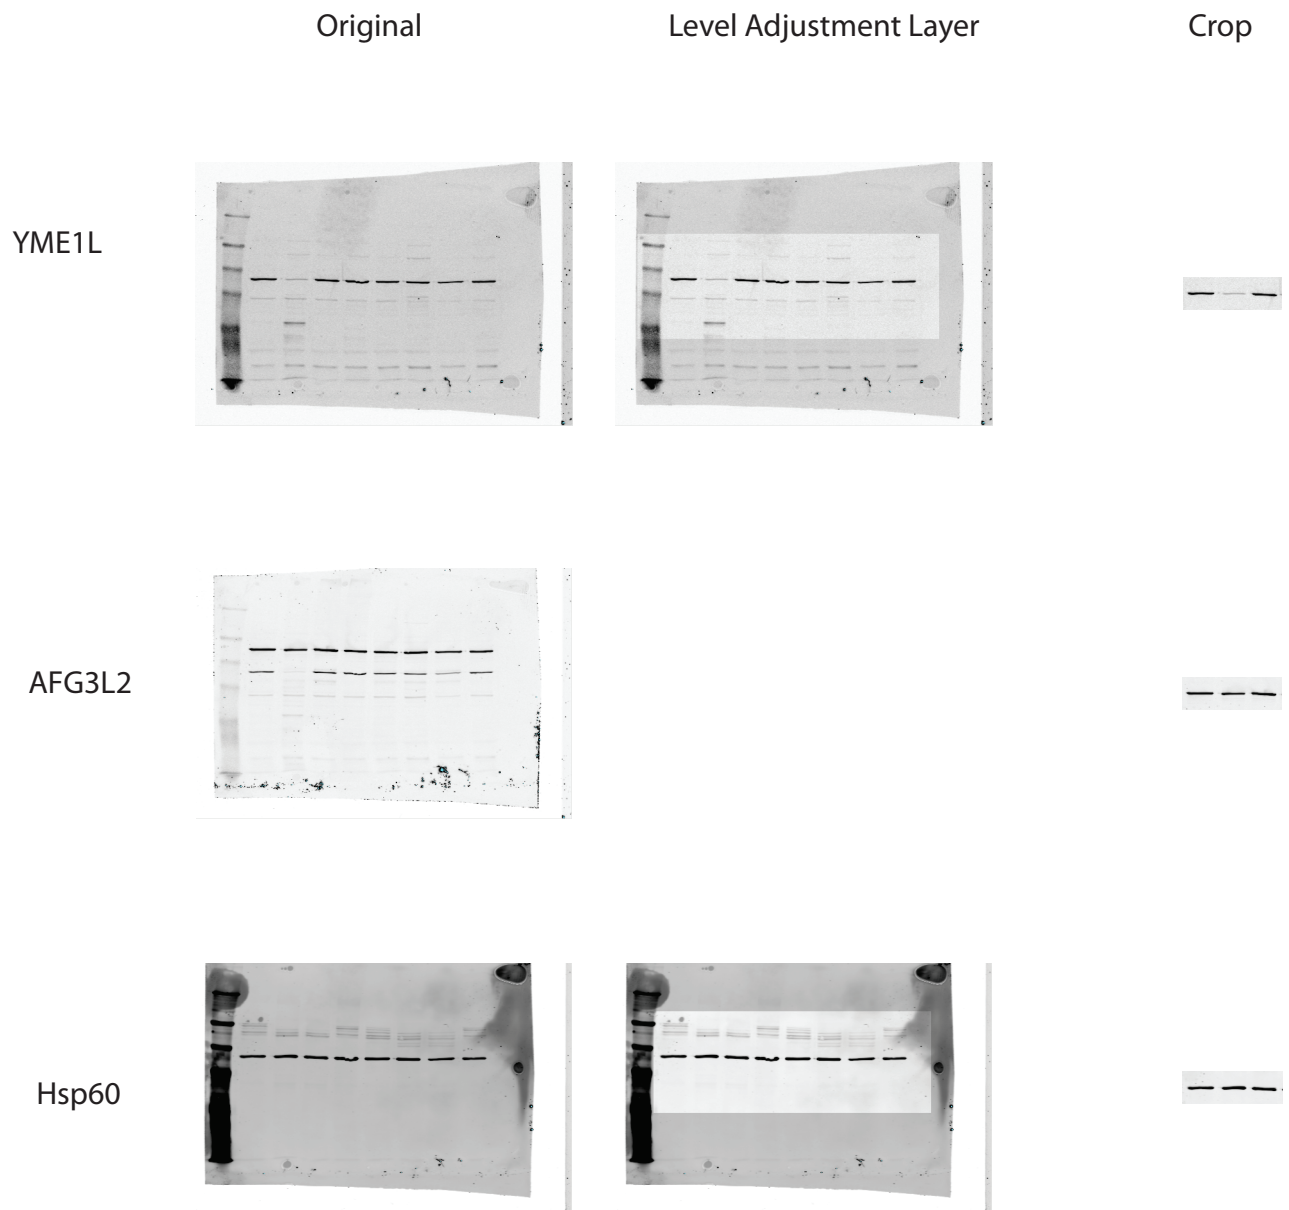

Original

Level Adjust Layer

Crop

YME1L

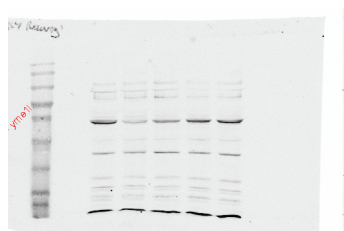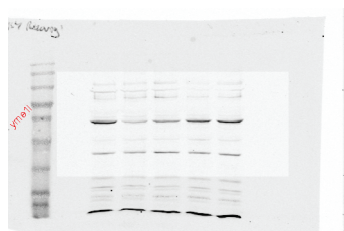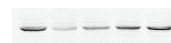

AFG3L2

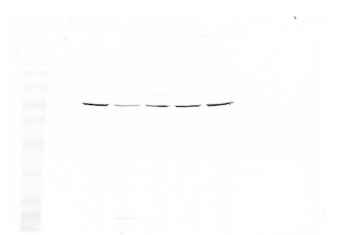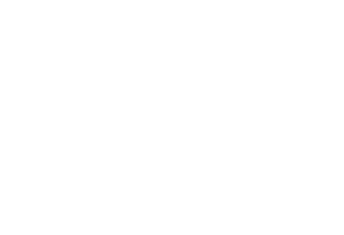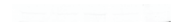

OMA1

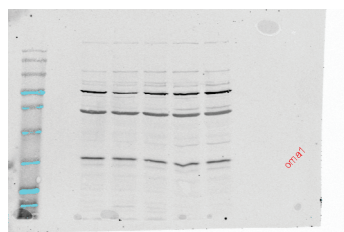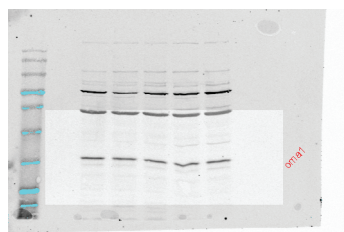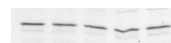

OPA1

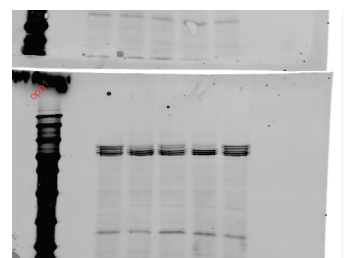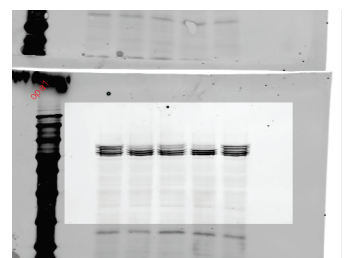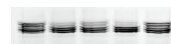

HSP60

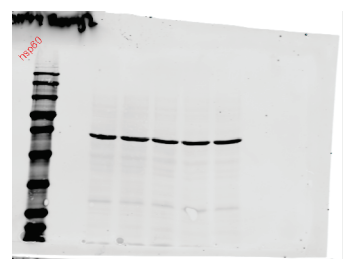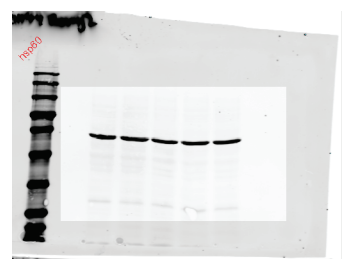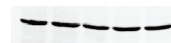

Tubulin

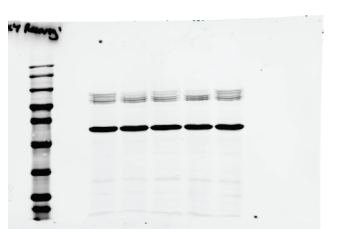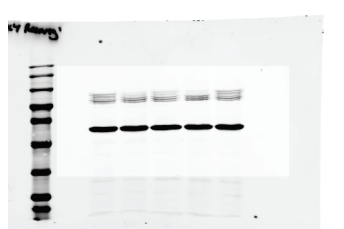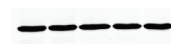

Supplement: embr0016-0097-sd4.pdf [file embr0016-0097-sd4.pdf]

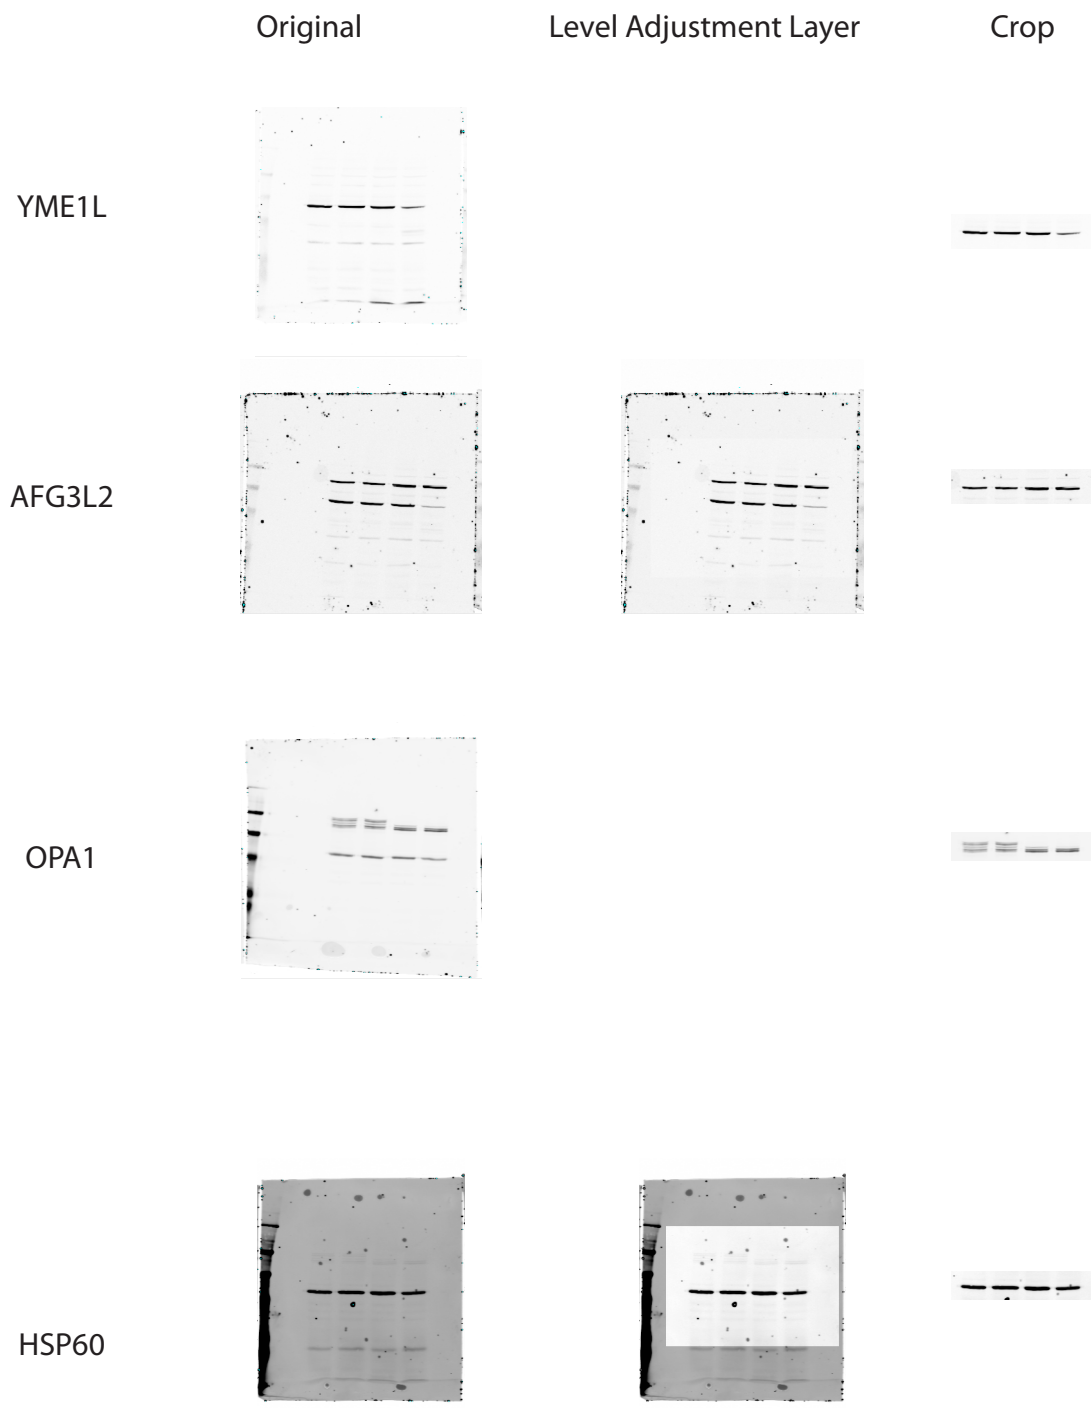

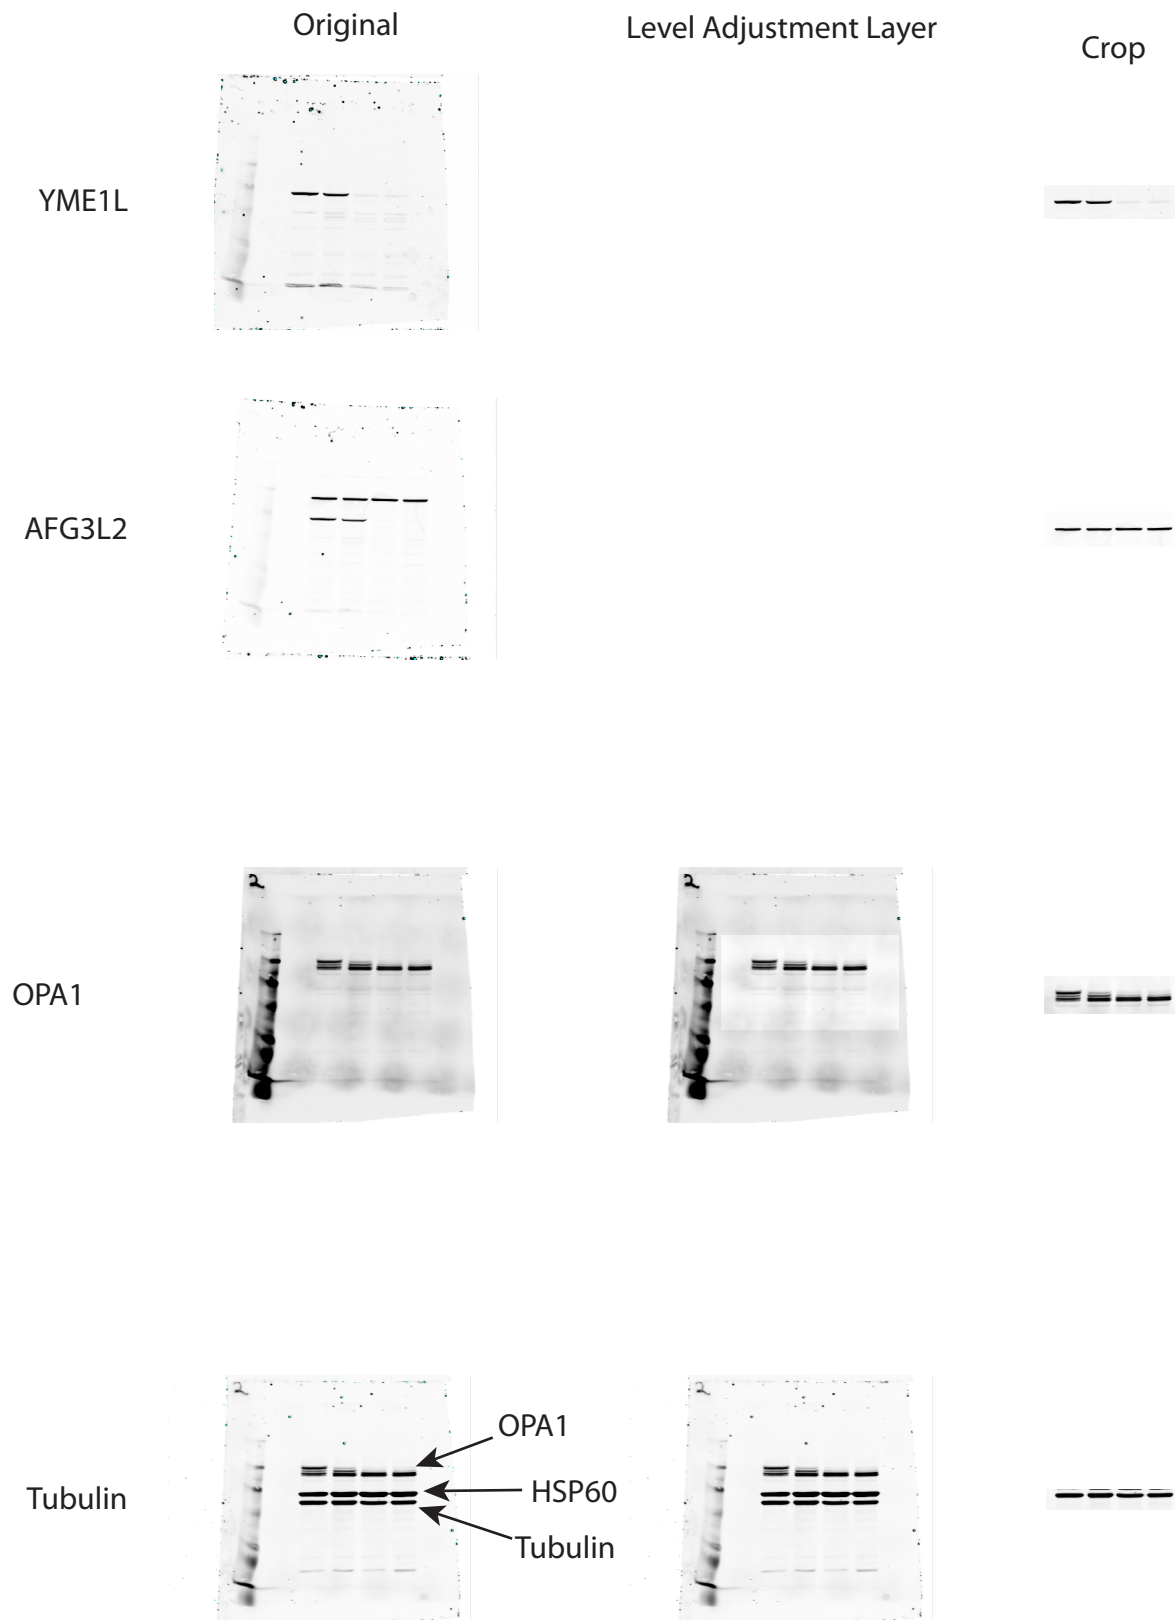

Original

Level Adjust Later

Crop

OMA1

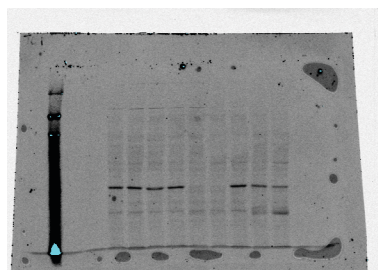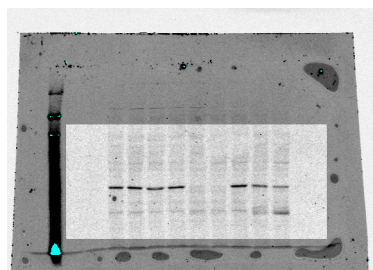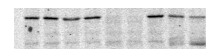

YME1L

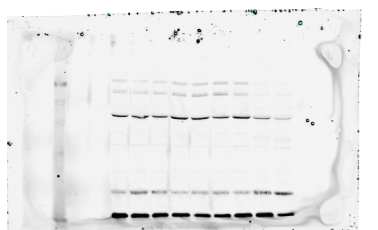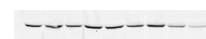

AFG3L2

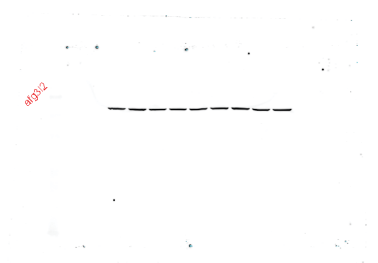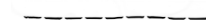

OPA1

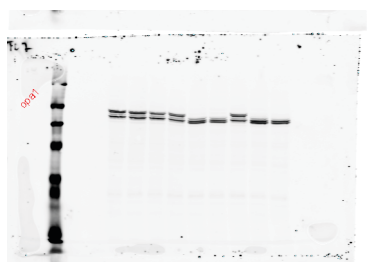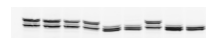

HSP60

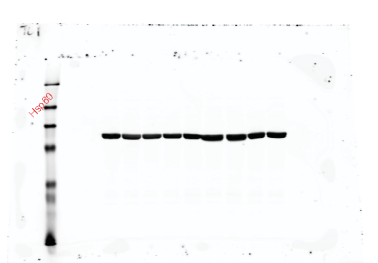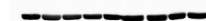

Tubulin

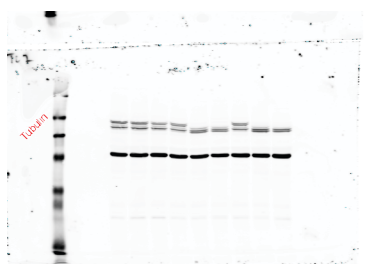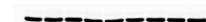

Supplement: embr0016-0097-sd5.pdf [file embr0016-0097-sd5.pdf]

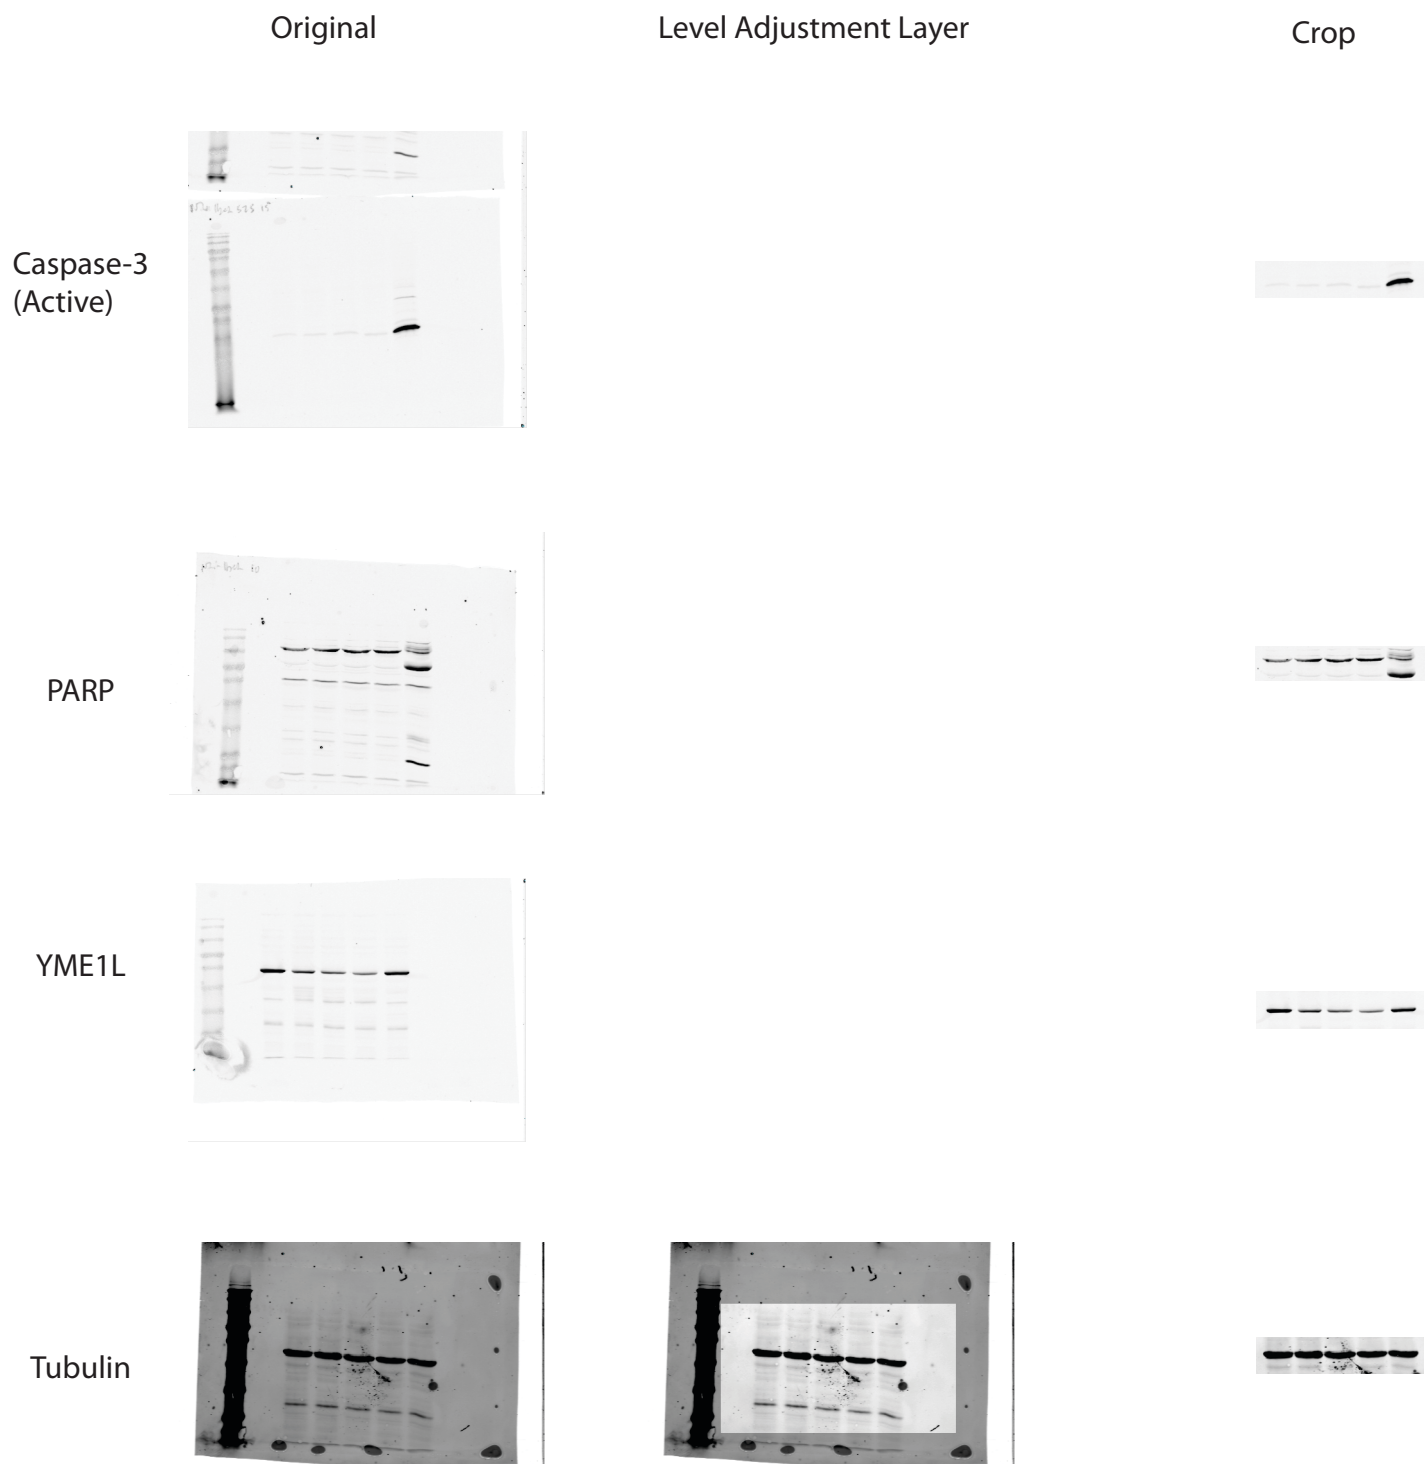

Original

Level Adjust Layer

Crop

YME1L

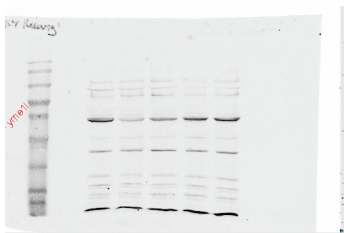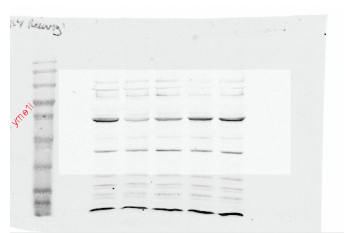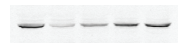

AFG3L2

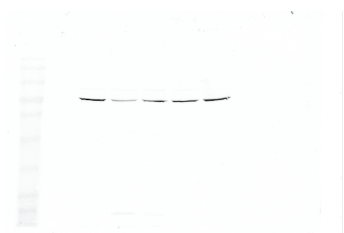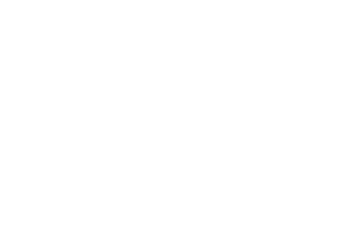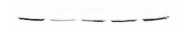

OMA1

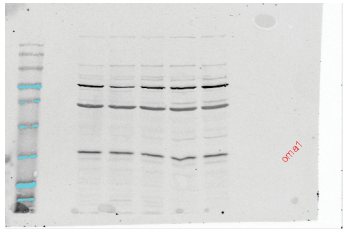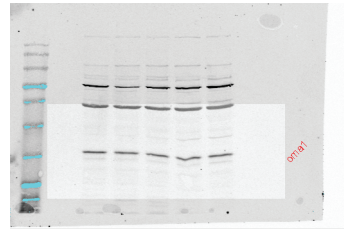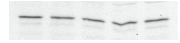

OPA1

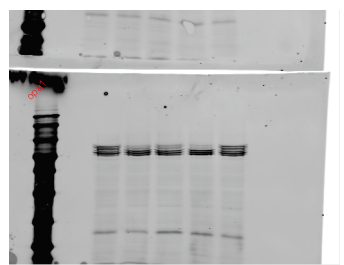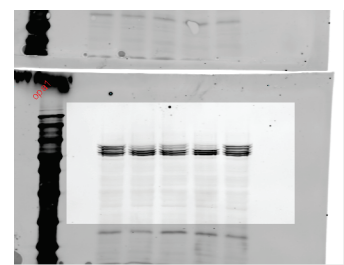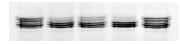

HSP60

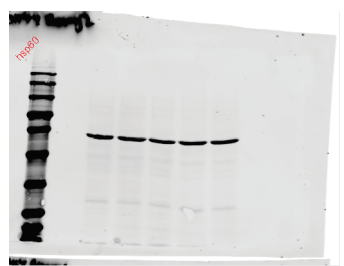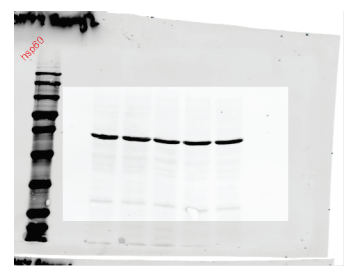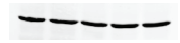

Tubulin

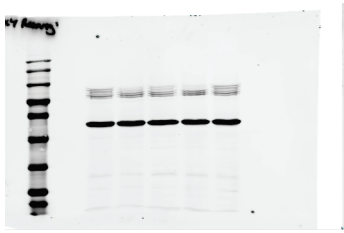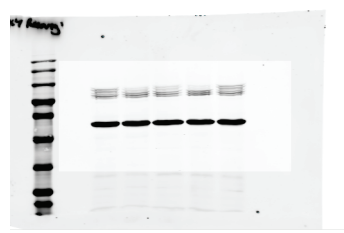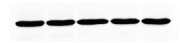

Supplement: embr0016-0097-sd6.pdf [file embr0016-0097-sd6.pdf]
